# Supplementary material for: Nitrogen doped carbon quantum dots: a multifaceted carbon nanomaterial that interferes in an amyloid-forming trajectory
Source: Royal Society of Chemistry journal article supplement (doi:10.1039/d4tb02104e), 2024-12-03
Supplement: d4tb02104e1.pdf [file d4tb02104e1.pdf]

## Supporting Information

### **Nitrogen Doped Carbon Quantum Dots: A Multifaceted Carbon Nanomaterial that interferes in an amyloid-forming trajectory**

Sherin M. ElMorsy,<sup>1</sup> Denisse A Gutierrez,<sup>2</sup> Salvador Valdez,<sup>3</sup> Jyotish Kumar,<sup>3</sup> Renato J  
Aguilera,<sup>2</sup> Mohamed Noufal,<sup>4</sup> Sampath Chinnam,<sup>5</sup> Hemen Sarma,<sup>6</sup> and Mahesh Narayan<sup>3,\*</sup>

<sup>1</sup>The Environmental Science & Engineering Program, The University of Texas at El Paso, El Paso, TX 79968, USA

<sup>2</sup>Cellular Characterization and Biorepository Core Facility, Border Biomedical Research Center, Department of Biological Sciences, College of Science, The University of Texas at El Paso, 500 West University Avenue, El Paso, TX 79968-0519, USA.

<sup>3</sup>Department of Chemistry and Biochemistry, The University of Texas at El Paso, 500 West University Avenue, El Paso, Texas 79968, United States.

<sup>4</sup>Department of Chemical Engineering, Hampton University, Hampton, VA 23668, USA.

<sup>5</sup>Department of Chemistry, M.S. Ramaiah Institute of Technology (Autonomous Institution, Affiliated to Visvesvaraya Technological University, Belgaum), Bengaluru, Karnataka 560054, India

<sup>6</sup>Bioremediation Technology Research Group, Department of Botany, Bodoland University, Rangalikhata, Deborgaon, 783370, Kokrajhar (BTR), Assam, India

*\*Corresponding Author. E-mail: [mnarayan@utep.edu](mailto:mnarayan@utep.edu). Mailing address: Dept. of Chemistry and Biochemistry, UTEP, 500 W. University Ave., El Paso, TX 79968. Phone: 915-747-6614. Fax: 915-747-5748.*

*ORCID: Mahesh Narayan: 0000-0002-2194-5228*

**Table S1:** Antioxidant activity comparison between N-CQDs and recently reported CQDs.

| Carbon nanomaterials                               | DPPH Assay (Scavenging Efficiency) | Concentration           | Reference |
|----------------------------------------------------|------------------------------------|-------------------------|-----------|
| Graphene Quantum Dots                              | 79%                                | 20 µg/mL                | 1         |
| Graphene oxide                                     | 42%                                | 20 µg/mL                | 1         |
| Se-CQDs                                            | 40%                                | 200 µg/mL               | 2         |
| Selenium and Nitrogen Co-Doped Carbon Quantum Dots | 55%                                | 0.4 mg/ml               | 3         |
| Carbon dots                                        | 12.5 %                             | 20 µg/ mL <sup>1</sup>  | 4         |
| Nitrogen Doped Carbon Quantum Dots                 | 41%                                | 100 µg/ mL <sup>1</sup> |           |

## References

- (1) Hu, X.; Ma, X.-Y.; Tian, J.; Huang, Z. Rapid and facile synthesis of graphene quantum dots with high antioxidant activity. *Inorganic Chemistry Communications* **2020**, *122*, 108288. DOI: <https://doi.org/10.1016/j.inoche.2020.108288>.
- (2) Huang, G.; Lin, Y.; Zhang, L.; Yan, Z.; Wang, Y.; Liu, Y. Synthesis of Sulfur-Selenium Doped Carbon Quantum Dots for Biological Imaging and Scavenging Reactive Oxygen Species. *Scientific Reports* **2019**, *9* (1), 19651. DOI: 10.1038/s41598-019-55996-w.
- (3) Xu, Q.; Liu, X.; Jiang, Y.; Wang, P. A highly sensitive and selective probe for the colorimetric detection of Mn (II) based on the antioxidative selenium and nitrogen co-doped carbon quantum dots and ABTS•+. *Frontiers in Chemistry* **2021**, *9*, 658105.
- (4) Innocenzi, P.; Stagi, L. Carbon dots as oxidant-antioxidant nanomaterials, understanding the structure-properties relationship. A critical review. *Nano Today* **2023**, *50*, 101837. DOI: <https://doi.org/10.1016/j.nantod.2023.101837>.
